# Supplementary material for: Chromosomal Instability in Near-Diploid Colorectal Cancer: A Link between Numbers and Structure
Source: PubMed Central journal article supplement (PMC2238794; doi:10.1371/journal.pone.0001632), 2008-02-20
Supplement: pone.0001632.s001.pdf [file pone.0001632.s001.pdf]

| Case | Age | Gender | A. C. | Loc | Karyo | Ch Nb | MSI |
|------|-----|--------|-------|-----|-------|-------|-----|
| 1    | 58  | F      | C1    | S   | 11    | 41    | U   |
| 2    | 59  | F      | B2    | R   | 21    | 51    | S   |
| 3    | 56  | M      | B1    | S   | 13    | 44    | S   |
| 4    | 72  | F      | C1    | R   | 12    | 47    | S   |
| 5    | 72  | F      | C2    | P   | 12    | 46    | I   |
| 6    | 48  | M      | ND    | R   | 3     | 45    | U   |
| 7    | 48  | F      | B2    | P   | ?     | 46    | I   |
| 8    | 68  | M      | D     | P   | 9     | 44    | S   |
| 9    | 56  | F      | D     | R   | 16    | 52    | S   |
| 10   | 70  | F      | B2    | P   | 8     | 46    | I   |
| 11   | 66  | F      | B1    | R   | 7     | 50    | S   |
| 12   | 73  | F      | C2    | P   | 11    | 49    | I   |
| 13   | 64  | M      | C2    | S   | 16    | 44    | S   |
| 14   | 71  | M      | B2    | S   | 5     | 44    | S   |
| 15   | 71  | M      | B1    | R   | 2     | 50    | S   |
| 16   | 78  | M      | B2    | S   | 10    | 49    | U   |
| 17   | 62  | F      | B2    | P   | 7     | 46    | I   |
| 18   | 46  | F      | D     | R   | 14    | 48    | U   |
| 19   | 62  | F      | B2    | P   | 9     | 46    | I   |
| 20   | 70  | M      | D     | R   | 11    | 41    | U   |
| 21   | 55  | F      | B1    | R   | 3     | 50    | S   |
| 22   | 65  | F      | B1    | P   | 8     | 47    | I   |
| 23   | 29  | M      | C1    | P   | 6     | 46    | U   |
| 24   | 19  | M      | ND    | L   | 6     | 46    | U   |
| 25   | 82  | F      | B2    | P   | 7     | 47    | I   |
| 26   | 41  | F      | C2    | R   | 19    | 49    | U   |
| 27   | 75  | F      | B2    | S   | 19    | 46    | U   |
| 28   | 84  | F      | B2    | S   | 10    | 44    | S   |
| 29   | 66  | F      | C2    | S   | 6     | 42    | S   |
| 30   | 83  | F      | B2    | R   | 8     | 44    | S   |
| 31   | 75  | F      | B2    | S   | 13    | 44    | U   |
| 32   | 24  | M      | D     | L   | 13    | 46    | I   |
| 33   | 67  | F      | B2    | S   | 12    | 57    | S   |
| 34   | 29  | F      | C1    | P   | 14    | 46    | I   |
| 35   | 70  | F      | C2    | R   | 12    | 48    | S   |
| 36   | 52  | F      | C1    | R   | 15    | 43    | S   |
| 37   | 49  | M      | B2    | R   | 18    | 49    | S   |
| 38   | 58  | M      | D     | R   | 2     | 47    | U   |
| 39   | 83  | F      | B2    | P   | 14    | 53    | S   |
| 40*  | 31  | F      | C     | R   | 14    | 40    | U   |
| 41   | 56  | M      | B2    | R   | 6     | 41    | U   |
| 42   | 75  | F      | B1    | R   | 40    | 42    | S   |
| 43   | 78  | M      | ND    | R   | 8     | 46    | U   |
| 44   | 58  | M      | D     | P   | 8     | 47    | S   |
| 45   | 86  | F      | B1    | P   | 11    | 46    | I   |
| 46   | 75  | F      | B2    | P   | 18    | 41    | U   |
| 47   | 63  | F      | B2    | P   | 10    | 47    | U   |
| 48   | 72  | M      | B1    | R   | 10    | 46    | U   |
| 49   | 57  | F      | D     | R   | 7     | 57    | S   |
| 50   | 54  | F      | C1    | R   | 6     | 46    | S   |
| 51   | 71  | F      | B1    | S   | 5     | 46    | S   |
| 52   | 61  | F      | D     | U   | 10    | 46    | U   |
| 53   | 76  | F      | D     | L   | 21    | 43    | S   |
| 54   | 72  | F      | D     | S   | 7     | 46    | S   |
| 55   | 73  | F      | C1    | P   | 7     | 46    | S   |
| 56   | 57  | F      | D     | L   | 7     | 42    | U   |
| 57   | 57  | M      | A     | R   | 15    | 51    | S   |
| 58   | 29  | F      | B2    | S   | 9     | 47    | I   |
| 59   | 59  | M      | B2    | L   | 11    | 46    | S   |
| 60   | 48  | F      | A     | P   | 1     | 49    | S   |
| 61   | 69  | M      | ND    | R   | 11    | 42    | S   |
| 62   | 77  | F      | C1    | P   | 12    | 47    | I   |
| 63   | 72  | F      | C2    | R   | 10    | 46    | S   |
| 64   | 43  | M      | C2    | P   | 29    | 47    | I   |
| 65   | 48  | F      | B1    | R   | 7     | 56    | S   |
| 66   | 76  | M      | C2    | R   | 11    | 44    | U   |
| 67   | 78  | M      | ND    | R   | 17    | 45    | U   |
| 68   | 74  | F      | C1    | R   | 24    | 45    | U   |
| 69   | 67  | M      | D     | P   | 13    | 46    | I   |
| 70   | 84  | M      | C2    | S   | 15    | 47    | S   |
| 71   | 81  | F      | C1    | P   | 12    | 47    | I   |
| 72   | 84  | F      | A     | R   | 14    | 47    | U   |
| 73   | 64  | F      | D     | S   | 8     | 47    | S   |
| 74   | 52  | F      | C2    | L   | 4     | 43    | U   |

|     |    |   |    |   |     |    |   |
|-----|----|---|----|---|-----|----|---|
| 75  | 65 | F | C1 | R | 11  | 50 | S |
| 76  | 43 | F | D  | L | 8   | 47 | U |
| 77  | 59 | M | B1 | R | 110 | 46 | S |
| 78  | 71 | M | B1 | R | 7   | 51 | S |
| 79  | 79 | F | C2 | S | 6   | 44 | U |
| 80  | 64 | F | C  | P | 15  | 46 | S |
| 81  | 49 | F | ND | S | 15  | 53 | S |
| 82  | 80 | M | D  | R | 7   | 46 | S |
| 83  | 76 | F | B2 | S | 16  | 43 | U |
| 84  | 59 | F | B1 | P | 2   | 46 | I |
| 85  | 54 | F | D  | P | 19  | 49 | S |
| 86  | 80 | M | ND | R | 9   | 52 | S |
| 87  | 65 | F | C1 | R | 16  | 48 | I |
| 88  | 72 | M | B2 | R | 5   | 44 | S |
| 89  | 81 | M | D  | R | 6   | 47 | U |
| 90  | 75 | M | B2 | P | 9   | 48 | I |
| 91  | 82 | F | ND | R | 6   | 48 | S |
| 92* | 57 | M | C1 | R | 18  | 55 | S |
| 93  | 79 | F | C1 | S | 11  | 43 | U |
| 94  | 86 | F | C2 | P | 6   | 46 | I |
| 95  | 57 | M | C2 | R | 8   | 58 | S |
| 96* | 53 | M | B2 | R | 19  | 46 | U |

**Supplementary Table S1.** Clinical, chromosomal and MSI data from 96 near-diploid colorectal tumors

Case, tumor number; \* patients with familial adenomatous polyposis; Age, patient's age (years); Gender, female (F) or male (M); A.C., Astler Coller staging; Loc, tumor location: left (L), proximal (P), rectum (R), sigmoid (S) or unknown (U); karyo, number of karyotypes established; Ch Nb, mean number of chromosomes; MSI, microsatellite instability status: instable (I), stable (S) or unknown (U)
