# Supplementary material for: Chromosomal Instability in Near-Diploid Colorectal Cancer: A Link between Numbers and Structure
Source: PubMed Central journal article supplement (PMC2238794; doi:10.1371/journal.pone.0001632), 2008-02-20
Supplement: pone.0001632.s002.pdf [file pone.0001632.s002.pdf]

| Case                                             | losses | gains | MSG | 1 | 2 | 3 | 4 | 5 | 6 | 7 | 8 | 9 | 10 | 11 | 12 | 13 | 14 | 15 | 16 | 17 | 18 | 19 | 20 | 21 | 22 | X | Y |
|--------------------------------------------------|--------|-------|-----|---|---|---|---|---|---|---|---|---|----|----|----|----|----|----|----|----|----|----|----|----|----|---|---|
| <b>TUMORS WITH MICROSATELLITE INSTABILITY</b>    |        |       |     |   |   |   |   |   |   |   |   |   |    |    |    |    |    |    |    |    |    |    |    |    |    |   |   |
| 5                                                | 3      | 0     | 3   | 2 | 2 | 2 | 2 | 2 | 2 | 1 | 2 | 2 | 2  | 2  | 2  | 2  | 2  | 2  | 2  | 2  | 1  | 2  | 2  | 2  | 2  | 1 | * |
| 7                                                | 0      | 0     | 0   | 2 | 2 | 2 | 2 | 2 | 2 | 2 | 2 | 2 | 2  | 2  | 2  | 2  | 2  | 2  | 2  | 2  | 2  | 2  | 2  | 2  | 2  | 2 | * |
| 10                                               | 0      | 0     | 0   | 2 | 2 | 2 | 2 | 2 | 2 | 2 | 2 | 2 | 2  | 2  | 2  | 2  | 2  | 2  | 2  | 2  | 2  | 2  | 2  | 2  | 2  | 2 | * |
| 12                                               | 0      | 3     | 3   | 2 | 2 | 2 | 2 | 2 | 3 | 2 | 3 | 3 | 2  | 2  | 2  | 2  | 2  | 2  | 2  | 2  | 2  | 2  | 2  | 2  | 2  | 2 | * |
| 17                                               | 0      | 0     | 0   | 2 | 2 | 2 | 2 | 2 | 2 | 2 | 2 | 2 | 2  | 2  | 2  | 2  | 2  | 2  | 2  | 2  | 2  | 2  | 2  | 2  | 2  | 2 | * |
| 19                                               | 2      | 2     | 4   | 2 | 2 | 2 | 2 | 2 | 2 | 2 | 2 | 2 | 2  | 2  | 2  | 2  | 2  | 2  | 2  | 2  | 3  | 1  | 2  | 1  | 3  | 2 | * |
| 22                                               | 0      | 1     | 1   | 2 | 2 | 2 | 2 | 2 | 2 | 2 | 2 | 2 | 2  | 2  | 3  | 2  | 2  | 2  | 2  | 2  | 2  | 2  | 2  | 2  | 2  | 2 | * |
| 25                                               | 1      | 0     | 1   | 2 | 2 | 2 | 2 | 2 | 2 | 2 | 2 | 2 | 2  | 2  | 2  | 2  | 2  | 2  | 2  | 2  | 2  | 2  | 2  | 2  | 2  | 2 | * |
| 32                                               | 0      | 0     | 0   | 2 | 2 | 2 | 2 | 2 | 2 | 2 | 2 | 2 | 2  | 2  | 2  | 2  | 2  | 2  | 2  | 2  | 2  | 2  | 2  | 2  | 2  | 2 | 2 |
| 34                                               | 0      | 0     | 0   | 2 | 2 | 2 | 2 | 2 | 2 | 2 | 2 | 2 | 2  | 2  | 2  | 2  | 2  | 2  | 2  | 2  | 2  | 2  | 2  | 2  | 2  | 2 | * |
| 45                                               | 0      | 0     | 0   | 2 | 2 | 2 | 2 | 2 | 2 | 2 | 2 | 2 | 2  | 2  | 2  | 2  | 2  | 2  | 2  | 2  | 2  | 2  | 2  | 2  | 2  | 2 | * |
| 58                                               | 0      | 4     | 4   | 2 | 3 | 2 | 2 | 2 | 2 | 3 | 2 | 2 | 2  | 2  | 3  | 3  | 2  | 2  | 2  | 2  | 2  | 2  | 2  | 2  | 2  | 2 | * |
| 62                                               | 0      | 0     | 0   | 2 | 2 | 2 | 2 | 2 | 2 | 2 | 2 | 2 | 2  | 2  | 2  | 2  | 2  | 2  | 2  | 2  | 2  | 2  | 2  | 2  | 2  | 2 | * |
| 64                                               | 0      | 3     | 3   | 2 | 2 | 2 | 2 | 2 | 2 | 2 | 3 | 2 | 2  | 2  | 2  | 2  | 3  | 2  | 2  | 2  | 2  | 2  | 3  | 2  | 2  | 2 | 2 |
| 69                                               | 1      | 0     | 1   | 2 | 2 | 2 | 2 | 2 | 2 | 2 | 2 | 2 | 2  | 2  | 2  | 2  | 2  | 2  | 2  | 2  | 2  | 2  | 2  | 2  | 2  | 1 | * |
| 71                                               | 0      | 2     | 2   | 2 | 2 | 2 | 2 | 2 | 2 | 2 | 3 | 2 | 2  | 2  | 2  | 3  | 2  | 2  | 2  | 2  | 2  | 2  | 2  | 2  | 2  | 2 | * |
| 84                                               | 0      | 0     | 0   | 2 | 2 | 2 | 2 | 2 | 2 | 2 | 2 | 2 | 2  | 2  | 2  | 2  | 2  | 2  | 2  | 2  | 2  | 2  | 2  | 2  | 2  | 2 | * |
| 87                                               | 0      | 5     | 5   | 2 | 2 | 2 | 2 | 2 | 2 | 3 | 2 | 2 | 2  | 2  | 2  | 3  | 3  | 3  | 2  | 2  | 2  | 2  | 3  | 2  | 2  | 2 | * |
| 90                                               | 0      | 2     | 2   | 2 | 2 | 2 | 2 | 2 | 2 | 2 | 2 | 2 | 2  | 2  | 3  | 2  | 2  | 2  | 2  | 2  | 2  | 2  | 3  | 2  | 2  | 2 | 2 |
| 94                                               | 0      | 0     | 0   | 2 | 2 | 2 | 2 | 2 | 2 | 2 | 2 | 2 | 2  | 2  | 2  | 2  | 2  | 2  | 2  | 2  | 2  | 2  | 2  | 2  | 2  | 2 | * |
| <b>TUMORS WITHOUT MICROSATELLITE INSTABILITY</b> |        |       |     |   |   |   |   |   |   |   |   |   |    |    |    |    |    |    |    |    |    |    |    |    |    |   |   |
| 2                                                | 0      | 5     | 5   | 2 | 2 | 2 | 2 | 2 | 2 | 3 | 2 | 2 | 2  | 2  | 3  | 3  | 2  | 2  | 2  | 2  | 3  | 2  | 2  | 2  | 2  | 2 | * |
| 3                                                | 4      | 5     | 9   | 2 | 2 | 3 | 1 | 2 | 2 | 3 | 3 | 2 | 2  | 2  | 2  | 0  | 2  | 2  | 2  | 2  | 1  | 2  | 3  | 2  | 2  | 3 | 1 |
| 4                                                | 2      | 3     | 5   | 2 | 2 | 2 | 2 | 2 | 2 | 2 | 2 | 2 | 2  | 2  | 3  | 2  | 2  | 2  | 2  | 2  | 1  | 2  | 3  | 1  | 2  | 3 | * |
| 8                                                | 4      | 2     | 6   | 2 | 2 | 2 | 1 | 2 | 2 | 2 | 2 | 2 | 2  | 2  | 2  | 3  | 2  | 2  | 2  | 1  | 1  | 2  | 3  | 2  | 1  | 2 | 2 |
| 9                                                | 0      | 6     | 8   | 2 | 3 | 2 | 2 | 2 | 2 | 3 | 3 | 2 | 2  | 2  | 3  | 5  | 2  | 2  | 2  | 2  | 2  | 3  | 2  | 2  | 2  | 2 | * |
| 11                                               | 0      | 5     | 5   | 2 | 3 | 2 | 2 | 2 | 2 | 3 | 2 | 2 | 2  | 2  | 3  | 2  | 2  | 2  | 2  | 2  | 2  | 3  | 2  | 2  | 3  | 2 | * |
| 13                                               | 5      | 1     | 6   | 2 | 2 | 2 | 2 | 2 | 2 | 2 | 2 | 2 | 2  | 2  | 2  | 2  | 2  | 1  | 2  | 2  | 1  | 1  | 3  | 1  | 2  | 2 | 1 |
| 14                                               | 10     | 0     | 10  | 2 | 1 | 2 | 1 | 2 | 2 | 2 | 1 | 2 | 1  | 2  | 2  | 1  | 1  | 2  | 1  | 2  | 1  | 2  | 2  | 1  | 2  | 2 | 1 |
| 15                                               | 0      | 4     | 4   | 2 | 2 | 2 | 2 | 2 | 2 | 3 | 2 | 2 | 2  | 2  | 3  | 2  | 2  | 2  | 2  | 2  | 2  | 2  | 3  | 2  | 2  | 3 | 2 |
| 21                                               | 0      | 5     | 5   | 2 | 2 | 2 | 3 | 2 | 2 | 3 | 2 | 2 | 2  | 2  | 3  | 3  | 2  | 2  | 2  | 2  | 2  | 2  | 3  | 2  | 2  | 2 | * |
| 28                                               | 7      | 0     | 7   | 2 | 2 | 2 | 2 | 2 | 2 | 1 | 2 | 2 | 1  | 2  | 2  | 2  | 1  | 1  | 2  | 1  | 1  | 2  | 2  | 2  | 1  | 2 | * |
| 29                                               | 3      | 1     | 4   | 2 | 2 | 2 | 2 | 2 | 2 | 2 | 2 | 2 | 2  | 2  | 2  | 2  | 2  | 2  | 2  | 1  | 1  | 2  | 3  | 2  | 1  | 1 | * |
| 30                                               | 6      | 0     | 6   | 2 | 2 | 2 | 2 | 2 | 2 | 2 | 2 | 2 | 1  | 2  | 2  | 2  | 1  | 1  | 2  | 2  | 1  | 2  | 1  | 2  | 1  | 2 | * |
| 33                                               | 0      | 11    | 11  | 2 | 3 | 2 | 2 | 2 | 2 | 3 | 3 | 2 | 3  | 2  | 3  | 4  | 2  | 2  | 3  | 2  | 2  | 2  | 4  | 2  | 2  | 3 | * |
| 35                                               | 2      | 4     | 6   | 2 | 2 | 2 | 2 | 2 | 2 | 2 | 3 | 2 | 2  | 2  | 2  | 3  | 2  | 2  | 2  | 1  | 2  | 2  | 4  | 2  | 2  | 1 | * |
| 36                                               | 6      | 0     | 6   | 2 | 2 | 2 | 1 | 2 | 2 | 2 | 2 | 2 | 1  | 2  | 2  | 2  | 2  | 1  | 2  | 1  | 2  | 1  | 2  | 2  | 2  | 1 | * |
| 37                                               | 2      | 4     | 6   | 2 | 2 | 2 | 2 | 2 | 2 | 3 | 3 | 2 | 2  | 2  | 3  | 2  | 2  | 2  | 2  | 2  | 1  | 2  | 2  | 1  | 2  | 3 | 2 |
| 39                                               | 2      | 6     | 8   | 3 | 3 | 2 | 2 | 2 | 2 | 2 | 3 | 1 | 3  | 2  | 2  | 2  | 2  | 3  | 2  | 2  | 1  | 2  | 3  | 2  | 2  | 2 | * |
| 42                                               | 4      | 1     | 5   | 2 | 2 | 2 | 1 | 2 | 2 | 2 | 2 | 2 | 2  | 2  | 2  | 3  | 1  | 1  | 2  | 2  | 1  | 2  | 2  | 2  | 2  | 2 | * |
| 44                                               | 4      | 1     | 5   | 2 | 2 | 2 | 2 | 2 | 2 | 2 | 2 | 2 | 2  | 2  | 2  | 2  | 2  | 1  | 2  | 2  | 1  | 2  | 3  | 2  | 1  | 2 | 1 |
| 49                                               | 2      | 12    | 14  | 2 | 2 | 2 | 2 | 2 | 3 | 2 | 3 | 1 | 3  | 2  | 2  | 4  | 2  | 2  | 3  | 2  | 1  | 3  | 4  | 2  | 2  | 4 | * |
| 50                                               | 1      | 2     | 3   | 2 | 2 | 2 | 2 | 2 | 2 | 2 | 2 | 2 | 2  | 2  | 2  | 2  | 2  | 2  | 2  | 2  | 1  | 2  | 3  | 2  | 2  | 3 | * |
| 51                                               | 2      | 3     | 5   | 2 | 2 | 2 | 2 | 2 | 2 | 2 | 2 | 2 | 2  | 2  | 2  | 4  | 1  | 2  | 2  | 2  | 1  | 2  | 3  | 2  | 2  | 2 | * |
| 53                                               | 3      | 0     | 3   | 2 | 2 | 2 | 2 | 2 | 2 | 2 | 2 | 2 | 2  | 2  | 2  | 2  | 2  | 1  | 2  | 2  | 2  | 2  | 2  | 1  | 2  | 2 | * |
| 54                                               | 3      | 0     | 3   | 2 | 2 | 2 | 2 | 2 | 2 | 2 | 2 | 2 | 2  | 2  | 2  | 2  | 2  | 1  | 2  | 1  | 1  | 2  | 2  | 2  | 2  | 2 | * |
| 55                                               | 0      | 0     | 0   | 2 | 2 | 2 | 2 | 2 | 2 | 2 | 2 | 2 | 2  | 2  | 2  | 2  | 2  | 2  | 2  | 2  | 2  | 2  | 2  | 2  | 2  | 2 | * |
| 57                                               | 1      | 9     | 10  | 2 | 2 | 3 | 2 | 3 | 3 | 2 | 3 | 3 | 2  | 2  | 3  | 3  | 2  | 2  | 2  | 2  | 1  | 2  | 3  | 2  | 2  | 3 | 2 |
| 59                                               | 0      | 0     | 0   | 2 | 2 | 2 | 2 | 2 | 2 | 2 | 2 | 2 | 2  | 2  | 2  | 2  | 2  | 2  | 2  | 2  | 2  | 2  | 2  | 2  | 2  | 2 | 2 |
| 60                                               | 1      | 3     | 4   | 2 | 2 | 2 | 2 | 2 | 2 | 2 | 3 | 3 | 2  | 2  | 3  | 2  | 2  | 2  | 2  | 1  | 2  | 2  | 2  | 2  | 2  | 2 | * |
| 61                                               | 4      | 0     | 4   | 2 | 2 | 2 | 2 | 2 | 2 | 2 | 2 | 2 | 2  | 2  | 2  | 2  | 1  | 1  | 2  | 2  | 1  | 2  | 2  | 2  | 2  | 2 | 1 |
| 63                                               | 0      | 2     | 2   | 2 | 2 | 2 | 2 | 2 | 2 | 2 | 3 | 2 | 2  | 2  | 3  | 2  | 2  | 2  | 2  | 2  | 2  | 2  | 2  | 2  | 2  | 2 | * |
| 65                                               | 0      | 10    | 10  | 2 | 2 | 3 | 2 | 2 | 3 | 2 | 3 | 3 | 2  | 2  | 3  | 4  | 2  | 2  | 4  | 2  | 2  | 2  | 2  | 2  | 2  | 3 | * |
| 70                                               | 3      | 5     | 8   | 2 | 2 | 2 | 2 | 2 | 2 | 2 | 2 | 2 | 2  | 2  | 2  | 5  | 2  | 1  | 3  | 2  | 1  | 2  | 3  | 1  | 2  | 2 | 2 |
| 73                                               | 3      | 3     | 6   | 2 | 2 | 2 | 2 | 2 | 2 | 3 | 2 | 1 | 2  | 2  | 2  | 2  | 2  | 3  | 2  | 2  | 1  | 2  | 3  | 2  | 2  | 1 | * |

|                                                  |   |    |    |   |   |   |   |   |   |   |   |   |   |   |   |   |   |   |   |   |   |   |   |   |   |   |   |   |
|--------------------------------------------------|---|----|----|---|---|---|---|---|---|---|---|---|---|---|---|---|---|---|---|---|---|---|---|---|---|---|---|---|
| 75                                               | 0 | 5  | 5  | 2 | 2 | 2 | 2 | 3 | 2 | 3 | 2 | 2 | 2 | 2 | 2 | 3 | 2 | 2 | 2 | 2 | 2 | 3 | 2 | 2 | 3 | * |   |   |
| 77                                               | 1 | 3  | 4  | 2 | 2 | 2 | 2 | 2 | 2 | 2 | 3 | 2 | 2 | 2 | 2 | 2 | 2 | 2 | 2 | 2 | 2 | 1 | 2 | 3 | 2 | 2 |   |   |
| 78                                               | 2 | 5  | 7  | 2 | 2 | 2 | 2 | 2 | 2 | 3 | 2 | 2 | 2 | 2 | 3 | 3 | 2 | 2 | 2 | 2 | 2 | 1 | 2 | 3 | 2 | 2 |   |   |
| 80                                               | 0 | 0  | 0  | 2 | 2 | 2 | 2 | 2 | 2 | 2 | 2 | 2 | 2 | 2 | 2 | 2 | 2 | 2 | 2 | 2 | 2 | 2 | 2 | 2 | 2 | * |   |   |
| 81                                               | 0 | 8  | 8  | 2 | 3 | 2 | 2 | 2 | 2 | 3 | 3 | 2 | 3 | 2 | 2 | 3 | 3 | 2 | 2 | 2 | 2 | 2 | 2 | 4 | 2 | 2 |   |   |
| 82                                               | 0 | 1  | 1  | 2 | 2 | 2 | 2 | 2 | 2 | 2 | 2 | 2 | 2 | 2 | 2 | 2 | 2 | 2 | 2 | 2 | 2 | 2 | 2 | 2 | 2 | 3 |   |   |
| 85                                               | 0 | 7  | 7  | 2 | 2 | 2 | 2 | 3 | 2 | 3 | 2 | 2 | 2 | 2 | 2 | 4 | 2 | 2 | 3 | 2 | 2 | 2 | 2 | 3 | 2 | * |   |   |
| 86                                               | 0 | 7  | 7  | 2 | 3 | 2 | 2 | 2 | 2 | 3 | 3 | 2 | 2 | 2 | 2 | 4 | 2 | 2 | 3 | 2 | 2 | 2 | 2 | 2 | 3 | 2 |   |   |
| 88                                               | 3 | 1  | 4  | 2 | 2 | 2 | 1 | 2 | 2 | 2 | 2 | 2 | 2 | 2 | 2 | 2 | 1 | 2 | 2 | 2 | 2 | 1 | 2 | 3 | 2 | 2 |   |   |
| 91                                               | 3 | 4  | 7  | 2 | 2 | 2 | 2 | 2 | 2 | 3 | 2 | 2 | 2 | 2 | 2 | 3 | 2 | 2 | 2 | 2 | 2 | 1 | 2 | 3 | 1 | 1 |   |   |
| 92                                               | 2 | 6  | 8  | 2 | 2 | 1 | 3 | 2 | 2 | 3 | 3 | 2 | 2 | 2 | 2 | 3 | 3 | 2 | 2 | 2 | 2 | 3 | 2 | 2 | 2 | 2 |   |   |
| 95                                               | 1 | 12 | 13 | 2 | 2 | 3 | 2 | 2 | 2 | 3 | 4 | 2 | 2 | 2 | 2 | 3 | 3 | 3 | 2 | 2 | 2 | 3 | 2 | 2 | 4 | 3 |   |   |
| <b>TUMORS WITH UNKNOWN MICROSATELLITE STATUS</b> |   |    |    |   |   |   |   |   |   |   |   |   |   |   |   |   |   |   |   |   |   |   |   |   |   |   |   |   |
| 1                                                | 5 | 0  | 5  | 2 | 2 | 2 | 2 | 1 | 2 | 2 | 1 | 2 | 2 | 2 | 2 | 1 | 1 | 2 | 2 | 2 | 1 | 2 | 2 | 2 | 2 | 2 | * |   |
| 6                                                | 3 | 1  | 4  | 2 | 2 | 2 | 2 | 2 | 2 | 2 | 1 | 3 | 2 | 2 | 2 | 2 | 1 | 2 | 2 | 2 | 1 | 2 | 2 | 2 | 2 | 2 | 2 |   |
| 16                                               | 3 | 2  | 5  | 2 | 2 | 2 | 2 | 2 | 2 | 3 | 2 | 2 | 2 | 2 | 2 | 2 | 2 | 2 | 2 | 2 | 1 | 2 | 2 | 2 | 2 | 3 | 1 |   |
| 18                                               | 1 | 4  | 5  | 2 | 2 | 2 | 2 | 2 | 2 | 2 | 2 | 3 | 2 | 2 | 2 | 3 | 2 | 2 | 2 | 2 | 2 | 1 | 2 | 3 | 2 | 2 | * |   |
| 20                                               | 5 | 0  | 5  | 2 | 2 | 2 | 1 | 2 | 2 | 2 | 2 | 2 | 2 | 2 | 2 | 2 | 2 | 2 | 2 | 2 | 1 | 1 | 2 | 2 | 1 | 2 | 1 |   |
| 23                                               | 0 | 0  | 0  | 2 | 2 | 2 | 2 | 2 | 2 | 2 | 2 | 2 | 2 | 2 | 2 | 2 | 2 | 2 | 2 | 2 | 2 | 2 | 2 | 2 | 2 | 2 | 2 |   |
| 24                                               | 0 | 0  | 0  | 2 | 2 | 2 | 2 | 2 | 2 | 2 | 2 | 2 | 2 | 2 | 2 | 2 | 2 | 2 | 2 | 2 | 2 | 2 | 2 | 2 | 2 | 2 | 2 |   |
| 26                                               | 1 | 6  | 7  | 2 | 2 | 2 | 2 | 2 | 2 | 3 | 2 | 2 | 2 | 2 | 3 | 3 | 2 | 2 | 2 | 2 | 2 | 2 | 2 | 4 | 1 | 2 | 3 |   |
| 27                                               | 2 | 3  | 5  | 2 | 2 | 2 | 2 | 2 | 2 | 2 | 2 | 2 | 2 | 2 | 2 | 4 | 2 | 2 | 2 | 2 | 2 | 1 | 2 | 2 | 3 | 2 | * |   |
| 31                                               | 4 | 2  | 6  | 2 | 2 | 2 | 2 | 2 | 2 | 2 | 2 | 2 | 2 | 2 | 2 | 2 | 1 | 1 | 2 | 2 | 1 | 3 | 1 | 2 | 2 | 3 | * |   |
| 38                                               | 2 | 3  | 5  | 2 | 2 | 2 | 2 | 2 | 2 | 3 | 2 | 2 | 2 | 2 | 2 | 4 | 1 | 2 | 2 | 2 | 2 | 1 | 2 | 2 | 2 | 2 | 2 |   |
| 40                                               | 7 | 0  | 7  | 2 | 2 | 2 | 2 | 2 | 2 | 2 | 2 | 1 | 2 | 2 | 2 | 2 | 1 | 1 | 1 | 1 | 2 | 1 | 1 | 1 | 1 | 2 | 2 | * |
| 41                                               | 5 | 1  | 6  | 2 | 2 | 2 | 1 | 2 | 2 | 3 | 2 | 2 | 2 | 2 | 2 | 2 | 2 | 2 | 0 | 2 | 2 | 1 | 1 | 2 | 2 | 2 | 2 |   |
| 43                                               | 2 | 2  | 4  | 2 | 2 | 2 | 2 | 2 | 2 | 2 | 2 | 2 | 2 | 2 | 2 | 3 | 1 | 2 | 2 | 2 | 2 | 1 | 2 | 2 | 2 | 3 | 2 |   |
| 46                                               | 4 | 1  | 5  | 2 | 2 | 2 | 1 | 2 | 2 | 1 | 2 | 2 | 2 | 2 | 2 | 3 | 2 | 1 | 2 | 2 | 2 | 1 | 2 | 2 | 2 | 2 | * |   |
| 47                                               | 1 | 2  | 3  | 2 | 2 | 2 | 2 | 2 | 2 | 2 | 2 | 2 | 2 | 2 | 2 | 2 | 2 | 2 | 2 | 2 | 2 | 1 | 2 | 3 | 2 | 2 | 3 |   |
| 48                                               | 2 | 2  | 4  | 2 | 2 | 2 | 2 | 2 | 2 | 2 | 2 | 2 | 2 | 2 | 2 | 3 | 1 | 2 | 2 | 2 | 2 | 1 | 2 | 2 | 2 | 3 | 2 |   |
| 52                                               | 0 | 0  | 0  | 2 | 2 | 2 | 2 | 2 | 2 | 2 | 2 | 2 | 2 | 2 | 2 | 2 | 2 | 2 | 2 | 2 | 2 | 2 | 2 | 2 | 2 | 2 | * |   |
| 56                                               | 4 | 1  | 5  | 2 | 2 | 2 | 1 | 2 | 2 | 2 | 2 | 2 | 2 | 2 | 2 | 2 | 1 | 2 | 2 | 2 | 2 | 1 | 2 | 3 | 2 | 1 | 2 |   |
| 66                                               | 4 | 2  | 6  | 2 | 2 | 2 | 2 | 2 | 2 | 3 | 2 | 2 | 2 | 2 | 2 | 2 | 1 | 2 | 2 | 2 | 2 | 1 | 2 | 2 | 1 | 2 | 3 |   |
| 67                                               | 3 | 2  | 5  | 2 | 2 | 2 | 2 | 2 | 2 | 1 | 2 | 2 | 2 | 2 | 2 | 3 | 2 | 2 | 2 | 2 | 2 | 2 | 2 | 2 | 2 | 3 | 1 |   |
| 68                                               | 5 | 4  | 9  | 2 | 2 | 3 | 1 | 1 | 3 | 2 | 2 | 2 | 2 | 2 | 2 | 3 | 2 | 2 | 2 | 2 | 2 | 1 | 1 | 2 | 1 | 1 | 2 |   |
| 72                                               | 3 | 2  | 5  | 2 | 2 | 2 | 2 | 2 | 2 | 2 | 2 | 2 | 2 | 2 | 2 | 3 | 2 | 2 | 2 | 2 | 2 | 1 | 1 | 2 | 2 | 2 | 3 |   |
| 74                                               | 7 | 1  | 8  | 2 | 2 | 2 | 1 | 1 | 2 | 2 | 2 | 2 | 2 | 2 | 2 | 1 | 3 | 2 | 2 | 2 | 2 | 1 | 1 | 2 | 2 | 1 | 1 |   |
| 76                                               | 1 | 1  | 2  | 2 | 2 | 2 | 2 | 2 | 2 | 3 | 2 | 2 | 2 | 2 | 2 | 2 | 2 | 2 | 2 | 2 | 2 | 2 | 2 | 2 | 2 | 2 | 1 |   |
| 79                                               | 3 | 0  | 3  | 2 | 2 | 2 | 2 | 2 | 2 | 2 | 2 | 2 | 2 | 2 | 2 | 2 | 2 | 1 | 1 | 2 | 2 | 1 | 2 | 2 | 2 | 2 | 2 |   |
| 83                                               | 2 | 1  | 3  | 2 | 2 | 2 | 1 | 2 | 2 | 2 | 2 | 3 | 2 | 2 | 2 | 2 | 2 | 2 | 2 | 2 | 2 | 1 | 2 | 2 | 2 | 2 | 2 |   |
| 89                                               | 3 | 1  | 4  | 2 | 2 | 2 | 2 | 2 | 2 | 2 | 3 | 2 | 2 | 2 | 2 | 2 | 2 | 2 | 1 | 2 | 2 | 1 | 2 | 1 | 2 | 2 | 2 |   |
| 93                                               | 2 | 0  | 2  | 2 | 2 | 2 | 2 | 2 | 2 | 2 | 2 | 2 | 2 | 2 | 2 | 2 | 2 | 2 | 2 | 2 | 2 | 1 | 2 | 2 | 2 | 2 | * |   |
| 96                                               | 4 | 4  | 8  | 2 | 3 | 2 | 2 | 2 | 2 | 3 | 3 | 2 | 2 | 2 | 2 | 2 | 1 | 2 | 3 | 2 | 2 | 1 | 2 | 1 | 2 | 1 | 2 |   |

**Supplementary Table S2.** Karyo-array of the tumors: involvement of individual chromosomes in missegregations

Chromosomes were coded as 2 if present in normal status (i.e. two copies for all autosomes, for X chromosome in females and one copy for X and Y chromosomes in males), as 1 or 0 (blue background) if one or two homologs were lost and as 3, 4 or 5 (red background) if one, two or three supernumerary copies were found.

Case, tumor number; losses, number of whole-chromosome losses; gains, number of whole-chromosome gains; MSG, missegregation i.e. total number of whole-chromosomes losses and gains
