# Supplementary material for: Chromosomal Instability in Near-Diploid Colorectal Cancer: A Link between Numbers and Structure
Source: PubMed Central journal article supplement (PMC2238794; doi:10.1371/journal.pone.0001632), 2008-02-20
Supplement: pone.0001632.s004.pdf [file pone.0001632.s004.pdf]

A

|      | -1p | -5q | -6q | +7 | -8p | +8q | -10q | +12 | +13 | +13q | -14 | -15 | -17p | +17q | -18 | +20 | +X | -Y | -4 | -6 | +6 | -8 | +8 | -4p | -4q | -11p | -11q | -9p | -9q |
|------|-----|-----|-----|----|-----|-----|------|-----|-----|------|-----|-----|------|------|-----|-----|----|----|----|----|----|----|----|-----|-----|------|------|-----|-----|
| -1p  | NO  | 7   | 4   | 6  | 12  | 8   | 5    | 3   | 9   | 9    | 11  | 7   | 17   | 6    | 24  | 10  | 5  | 4  | 11 | 1  | 0  | 3  | 4  | 3   | 2   | 3    | 5    | 4   | 2   |
| -5q  | NO  | NO  | 3   | 2  | 7   | 4   | 3    | 1   | 3   | 4    | 3   | 2   | 8    | 2    | 9   | 6   | 2  | 1  | 3  | 0  | 1  | 1  | 0  | 1   | 3   | 2    | 2    | 2   | 1   |
| -6q  | NO  | NO  | NO  | 2  | 5   | 3   | 1    | 2   | 3   | 2    | 3   | 2   | 7    | 1    | 8   | 4   | 4  | 1  | 2  | 0  | 0  | 2  | 3  | 0   | 0   | 1    | 1    | 1   | 1   |
| +7   | NO  | NO  | NO  | NO | 10  | 13  | 2    | 15  | 18  | 4    | 3   | 2   | 13   | 6    | 13  | 20  | 15 | 7  | 2  | 2  | 0  | 6  | 2  | 4   | 2   | 2    | 2    | 1   | 2   |
| -8p  | NO  | NO  | NO  | NO | NO  | 20  | 6    | 2   | 8   | 7    | 11  | 10  | 20   | 4    | 25  | 9   | 9  | 6  | 8  | 0  | 4  | 0  | 0  | 0   | 4   | 2    | 2    | 2   | 5   |
| +8q  | NO  | NO  | NO  | NO | NO  | NO  | 4    | 5   | 11  | 5    | 8   | 9   | 18   | 5    | 18  | 11  | 11 | 6  | 4  | 0  | 6  | 0  | 0  | 3   | 1   | 1    | 2    | 3   | 2   |
| -10q | NO  | NO  | NO  | NO | NO  | NO  | NO   | 2   | 3   | 3    | 2   | 6   | 5    | 1    | 9   | 4   | 1  | 5  | 2  | 0  | 0  | 0  | 0  | 1   | 2   | 0    | 0    | 2   | 0   |
| +12  | NO  | NO  | NO  | NO | NO  | NO  | NO   | NO  | 13  | 1    | 1   | 0   | 3    | 2    | 6   | 14  | 9  | 3  | 1  | 1  | 6  | 1  | 5  | 0   | 0   | 1    | 1    | 0   | 0   |
| +13  | NO  | NO  | NO  | NO | NO  | NO  | NO   | NO  | NO  | 1    | 5   | 3   | 12   | 5    | 15  | 20  | 15 | 4  | 4  | 1  | 6  | 1  | 5  | 1   | 0   | 0    | 2    | 1   | 2   |
| +13q | NO  | NO  | NO  | NO | NO  | NO  | NO   | NO  | NO  | NO   | 9   | 7   | 11   | 0    | 15  | 5   | 3  | 2  | 3  | 1  | 0  | 3  | 0  | 0   | 2   | 3    | 2    | 3   | 0   |
| -14  | NO  | NO  | NO  | NO | NO  | NO  | NO   | NO  | NO  | NO   | 8   | 16  | 3    | 19   | 3   | 2   | 3  | 5  | 1  | 1  | 1  | 1  | 4  | 0   | 0   | 1    | 1    | 4   | 2   |
| -15  | NO  | NO  | NO  | NO | NO  | NO  | NO   | NO  | NO  | NO   | NO  | 10  | 1    | 17   | 3   | 2   | 3  | 2  | 0  | 0  | 2  | 0  | 0  | 3   | 3   | 1    | 1    | 1   | 1   |
| -17p | NO  | NO  | NO  | NO | NO  | NO  | NO   | NO  | NO  | NO   | NO  | NO  | NO   | NO   | NO  | NO  | NO | NO | NO | NO | NO | NO | NO | NO  | NO  | NO   | NO   | NO  | NO  |
| +17q | NO  | NO  | NO  | NO | NO  | NO  | NO   | NO  | NO  | NO   | NO  | NO  | NO   | NO   | NO  | NO  | NO | NO | NO | NO | NO | NO | NO | NO  | NO  | NO   | NO   | NO  | NO  |
| -18  | NO  | NO  | NO  | NO | NO  | NO  | NO   | NO  | NO  | NO   | NO  | NO  | NO   | NO   | NO  | NO  | NO | NO | NO | NO | NO | NO | NO | NO  | NO  | NO   | NO   | NO  | NO  |
| +20  | NO  | NO  | NO  | NO | NO  | NO  | NO   | NO  | NO  | NO   | NO  | NO  | NO   | NO   | NO  | NO  | NO | NO | NO | NO | NO | NO | NO | NO  | NO  | NO   | NO   | NO  | NO  |
| +X   | NO  | NO  | NO  | NO | NO  | NO  | NO   | NO  | NO  | NO   | NO  | NO  | NO   | NO   | NO  | NO  | NO | NO | NO | NO | NO | NO | NO | NO  | NO  | NO   | NO   | NO  | NO  |
| -Y   | NO  | NO  | NO  | NO | NO  | NO  | NO   | NO  | NO  | NO   | NO  | NO  | NO   | NO   | NO  | NO  | NO | NO | NO | NO | NO | NO | NO | NO  | NO  | NO   | NO   | NO  | NO  |
| -4   | NO  | NO  | NO  | NO | NO  | NO  | NO   | NO  | NO  | NO   | NO  | NO  | NO   | NO   | NO  | NO  | NO | NO | NO | NO | NO | NO | NO | NO  | NO  | NO   | NO   | NO  | NO  |
| -6   | NO  | NO  | NO  | NO | NO  | NO  | NO   | NO  | NO  | NO   | NO  | NO  | NO   | NO   | NO  | NO  | NO | NO | NO | NO | NO | NO | NO | NO  | NO  | NO   | NO   | NO  | NO  |
| +6   | NO  | NO  | NO  | NO | NO  | NO  | NO   | NO  | NO  | NO   | NO  | NO  | NO   | NO   | NO  | NO  | NO | NO | NO | NO | NO | NO | NO | NO  | NO  | NO   | NO   | NO  | NO  |
| -8   | NO  | NO  | NO  | NO | NO  | NO  | NO   | NO  | NO  | NO   | NO  | NO  | NO   | NO   | NO  | NO  | NO | NO | NO | NO | NO | NO | NO | NO  | NO  | NO   | NO   | NO  | NO  |
| +8   | NO  | NO  | NO  | NO | NO  | NO  | NO   | NO  | NO  | NO   | NO  | NO  | NO   | NO   | NO  | NO  | NO | NO | NO | NO | NO | NO | NO | NO  | NO  | NO   | NO   | NO  | NO  |
| -4p  | NO  | NO  | NO  | NO | NO  | NO  | NO   | NO  | NO  | NO   | NO  | NO  | NO   | NO   | NO  | NO  | NO | NO | NO | NO | NO | NO | NO | NO  | NO  | NO   | NO   | NO  | NO  |
| -4q  | NO  | NO  | NO  | NO | NO  | NO  | NO   | NO  | NO  | NO   | NO  | NO  | NO   | NO   | NO  | NO  | NO | NO | NO | NO | NO | NO | NO | NO  | NO  | NO   | NO   | NO  | NO  |
| -11p | NO  | NO  | NO  | NO | NO  | NO  | NO   | NO  | NO  | NO   | NO  | NO  | NO   | NO   | NO  | NO  | NO | NO | NO | NO | NO | NO | NO | NO  | NO  | NO   | NO   | NO  | NO  |
| -11q | NO  | NO  | NO  | NO | NO  | NO  | NO   | NO  | NO  | NO   | NO  | NO  | NO   | NO   | NO  | NO  | NO | NO | NO | NO | NO | NO | NO | NO  | NO  | NO   | NO   | NO  | NO  |
| -9p  | NO  | NO  | NO  | NO | NO  | NO  | NO   | NO  | NO  | NO   | NO  | NO  | NO   | NO   | NO  | NO  | NO | NO | NO | NO | NO | NO | NO | NO  | NO  | NO   | NO   | NO  | NO  |
| -9q  | NO  | NO  | NO  | NO | NO  | NO  | NO   | NO  | NO  | NO   | NO  | NO  | NO   | NO   | NO  | NO  | NO | NO | NO | NO | NO | NO | NO | NO  | NO  | NO   | NO   | NO  | NO  |

B

|      | -1p | -5q  | -6q  | +7   | -8p  | +8q  | -10q | +12  | +13   | +13q | -14  | -15  | -17p  | +17q | -18   | +20   | +X   | -Y   | -4   | -6   | +6   | -8   | +8   | -4p  | -4q  | -11p | -11q | -9p  | -9q  |
|------|-----|------|------|------|------|------|------|------|-------|------|------|------|-------|------|-------|-------|------|------|------|------|------|------|------|------|------|------|------|------|------|
| -1p  | NO  | 3.50 | 3.21 | 9.33 | 8.16 | 7.58 | 3.21 | 6.42 | 9.33  | 5.25 | 5.54 | 4.96 | 11.66 | 3.50 | 14.87 | 10.50 | 7.87 | 3.79 | 3.79 | 0.87 | 2.92 | 1.75 | 3.21 | 1.46 | 1.75 | 1.46 | 1.75 | 1.17 |      |
| -5q  | NO  | NO   | 1.37 | 4.00 | 3.50 | 3.25 | 1.38 | 2.75 | 4.00  | 2.25 | 2.37 | 2.13 | 5.00  | 1.50 | 6.37  | 4.50  | 3.37 | 1.62 | 1.63 | 0.38 | 1.25 | 0.75 | 1.38 | 0.63 | 0.75 | 0.63 | 0.75 | 0.5  |      |
| -6q  | NO  | NO   | NO   | 3.66 | 3.21 | 2.98 | 1.26 | 2.52 | 3.66  | 2.06 | 2.18 | 1.95 | 4.58  | 1.37 | 5.84  | 4.12  | 3.09 | 1.49 | 1.49 | 0.34 | 1.15 | 0.69 | 1.26 | 0.57 | 0.69 | 0.57 | 0.69 | 0.46 |      |
| +7   | NO  | NO   | NO   | NO   | 9.33 | 8.66 | 3.67 | 7.33 | 10.66 | 6.00 | 6.33 | 5.67 | 13.33 | 4.00 | 17.00 | 12.00 | 9.00 | 4.33 | 4.33 | 1.00 | 3.33 | 2.00 | 3.67 | 1.67 | 2.00 | 1.67 | 2.00 | 1.33 |      |
| -8p  | NO  | NO   | NO   | NO   | NO   | 7.58 | 3.21 | 6.42 | 9.33  | 5.25 | 5.54 | 4.96 | 11.66 | 3.50 | 14.87 | 10.50 | 7.87 | 3.79 | 3.79 | 0.87 | 2.92 | 1.75 | 3.21 | 1.46 | 1.75 | 1.46 | 1.75 | 1.17 |      |
| +8q  | NO  | NO   | NO   | NO   | NO   | NO   | 2.98 | 5.96 | 8.66  | 4.87 | 5.14 | 4.60 | 10.83 | 3.25 | 13.81 | 9.75  | 7.31 | 3.52 | 3.52 | 0.81 | 2.71 | 1.62 | 2.98 | 1.35 | 1.62 | 1.35 | 1.62 | 1.08 |      |
| -10q | NO  | NO   | NO   | NO   | NO   | NO   | NO   | 2.52 | 3.67  | 2.06 | 2.18 | 1.95 | 4.58  | 1.37 | 5.84  | 4.12  | 3.09 | 1.49 | 1.49 | 0.34 | 1.15 | 0.69 | 1.26 | 0.57 | 0.69 | 0.57 | 0.69 | 0.46 |      |
| +12  | NO  | NO   | NO   | NO   | NO   | NO   | NO   | NO   | 7.33  | 4.13 | 4.35 | 3.90 | 9.17  | 2.75 | 11.69 | 8.25  | 6.19 | 2.98 | 2.98 | 0.69 | 2.29 | 1.38 | 2.52 | 1.15 | 1.38 | 1.15 | 1.38 | 1.38 | 0.92 |
| +13  | NO  | NO   | NO   | NO   | NO   | NO   | NO   | NO   | NO    | 6.00 | 6.33 | 5.67 | 13.33 | 4.00 | 17.00 | 12.00 | 9.00 | 4.33 | 4.33 | 1.00 | 3.33 | 2.00 | 3.67 | 1.67 | 2.00 | 1.67 | 2.00 | 1.33 |      |
| +13q | NO  | NO   | NO   | NO   | NO   | NO   | NO   | NO   | NO    | 3.56 | 3.19 | 7.50 | 2.25  | 9.56 | 6.75  | 5.06  | 2.44 | 2.44 | 0.56 | 1.88 | 1.13 | 2.06 | 0.94 | 1.13 | 0.94 | 1.13 | 1.13 | 0.75 |      |
| -14  | NO  | NO   | NO   | NO   | NO   | NO   | NO   | NO   | NO    | 3.36 | 7.91 | 2.37 | 10.09 | 7.12 | 5.34  | 2.57  | 2.57 | 0.59 | 1.98 | 1.19 | 2.18 | 0.99 | 1.19 | 0.99 | 1.19 | 1.19 | 1.19 | 0.79 |      |
| -15  | NO  | NO   | NO   | NO   | NO   | NO   | NO   | NO   | NO    | 7.08 | 2.13 | 9.03 | 6.38  | 4.78 | 2.30  | 2.30  | 0.53 | 1.77 | 1.06 | 1.95 | 0.89 | 1.06 | 0.89 | 1.06 | 0.89 | 1.06 | 1.06 | 1.19 |      |
| -17p | NO  | NO   | NO   | NO   | NO   | NO   | NO   | NO   | NO    | NO   | NO   | NO   | NO    | NO   | NO    | NO    | NO   | NO   | NO   | NO   | NO   | NO   | NO   | NO   | NO   | NO   | NO   | NO   | NO   |
| +17q | NO  | NO   | NO   | NO   | NO   | NO   | NO   | NO   | NO    | NO   | NO   | NO   | NO    | NO   | NO    | NO    | NO   | NO   | NO   | NO   | NO   | NO   | NO   | NO   | NO   | NO   | NO   | NO   | NO   |
| -18  | NO  | NO   | NO   | NO   | NO   | NO   | NO   | NO   | NO    | NO   | NO   | NO   | NO    | NO   | NO    | NO    | NO   | NO   | NO   | NO   | NO   | NO   | NO   | NO   | NO   | NO   | NO   | NO   | NO   |
| +20  | NO  | NO   | NO   | NO   | NO   | NO   | NO   | NO   | NO    | NO   | NO   | NO   | NO    | NO   | NO    | NO    | NO   | NO   | NO   | NO   | NO   | NO   | NO   | NO   | NO   | NO   | NO   | NO   | NO   |
| +X   | NO  | NO   | NO   | NO   | NO   | NO   | NO   | NO   | NO    | NO   | NO   | NO   | NO    | NO   | NO    | NO    | NO   | NO   | NO   | NO   | NO   | NO   | NO   | NO   | NO   | NO   | NO   | NO   | NO   |
| -Y   | NO  | NO   | NO   | NO   | NO   | NO   | NO   | NO   | NO    | NO   | NO   | NO   | NO    | NO   | NO    | NO    | NO   | NO   | NO   | NO   | NO   | NO   | NO   | NO   | NO   | NO   | NO   | NO   | NO   |
| -4   | NO  | NO   | NO   | NO   | NO   | NO   | NO   | NO   | NO    | NO   | NO   | NO   | NO    | NO   | NO    | NO    | NO   | NO   | NO   | NO   | NO   | NO   | NO   | NO   | NO   | NO   | NO   | NO   | NO   |
| -6   | NO  | NO   | NO   | NO   | NO   | NO   | NO   | NO   | NO    | NO   | NO   | NO   | NO    | NO   | NO    | NO    | NO   | NO   | NO   | NO   | NO   | NO   | NO   | NO   | NO   | NO   | NO   | NO   | NO   |
| +6   | NO  | NO   | NO   | NO   | NO   | NO   | NO   | NO   | NO    | NO   | NO   | NO   | NO    | NO   | NO    | NO    | NO   | NO   | NO   | NO   | NO   | NO   | NO   | NO   | NO   | NO   | NO   | NO   | NO   |
| -8   | NO  | NO   | NO   | NO   | NO   | NO   | NO   | NO   | NO    | NO   | NO   | NO   | NO    | NO   | NO    | NO    | NO   | NO   | NO   | NO   | NO   | NO   | NO   | NO   | NO   | NO   | NO   | NO   | NO   |
| +8   | NO  | NO   | NO   | NO   | NO   | NO   | NO   | NO   | NO    | NO   | NO   | NO   | NO    | NO   | NO    | NO    | NO   | NO   | NO   | NO   | NO   | NO   | NO   | NO   | NO   | NO   | NO   | NO   | NO   |
| -4p  | NO  | NO   | NO   | NO   | NO   | NO   | NO   | NO   | NO    | NO   | NO   | NO   | NO    | NO   | NO    | NO    | NO   | NO   | NO   | NO   | NO   | NO   | NO   | NO   | NO   | NO   | NO   | NO   | NO   |
| -4q  | NO  | NO   | NO   | NO   | NO   | NO   | NO   | NO   | NO    | NO   | NO   | NO   | NO    | NO   | NO    | NO    | NO   | NO   | NO   | NO   | NO   | NO   | NO   | NO   | NO   | NO   | NO   | NO   | NO   |
| -11p | NO  | NO   | NO   | NO   | NO   | NO   | NO   | NO   | NO    | NO   | NO   | NO   | NO    | NO   | NO    | NO    | NO   | NO   | NO   | NO   | NO   | NO   | NO   | NO   | NO   | NO   | NO   | NO   | NO   |
| -11q | NO  | NO   | NO   | NO   | NO   | NO   | NO   | NO   | NO    | NO   | NO   | NO   | NO    | NO   | NO    | NO    | NO   | NO   | NO   | NO   | NO   | NO   | NO   | NO   | NO   | NO   | NO   | NO   | NO   |
| -9p  | NO  | NO   | NO   | NO   | NO   | NO   | NO   | NO   | NO    | NO   | NO   | NO   | NO    | NO   | NO    | NO    | NO   | NO   | NO   | NO   | NO   | NO   | NO   | NO   | NO   | NO   | NO   | NO   | NO   |
| -9q  | NO  | NO   | NO   | NO   | NO   | NO   | NO   | NO   | NO    | NO   | NO   | NO   | NO    | NO   | NO    | NO    | NO   | NO   | NO   | NO   | NO   | NO   | NO   | NO   | NO   | NO   | NO   | NO   | NO   |

C

|  | -1p | -5q | -6q | +7 | -8p | +8q | -10q | +12 | + |
|--|-----|-----|-----|----|-----|-----|------|-----|---|
|--|-----|-----|-----|----|-----|-----|------|-----|---|
