# Supplementary material for: Chromosomal Instability in Near-Diploid Colorectal Cancer: A Link between Numbers and Structure
Source: PubMed Central journal article supplement (PMC2238794; doi:10.1371/journal.pone.0001632), 2008-02-20
Supplement: pone.0001632.s005.pdf [file pone.0001632.s005.pdf]

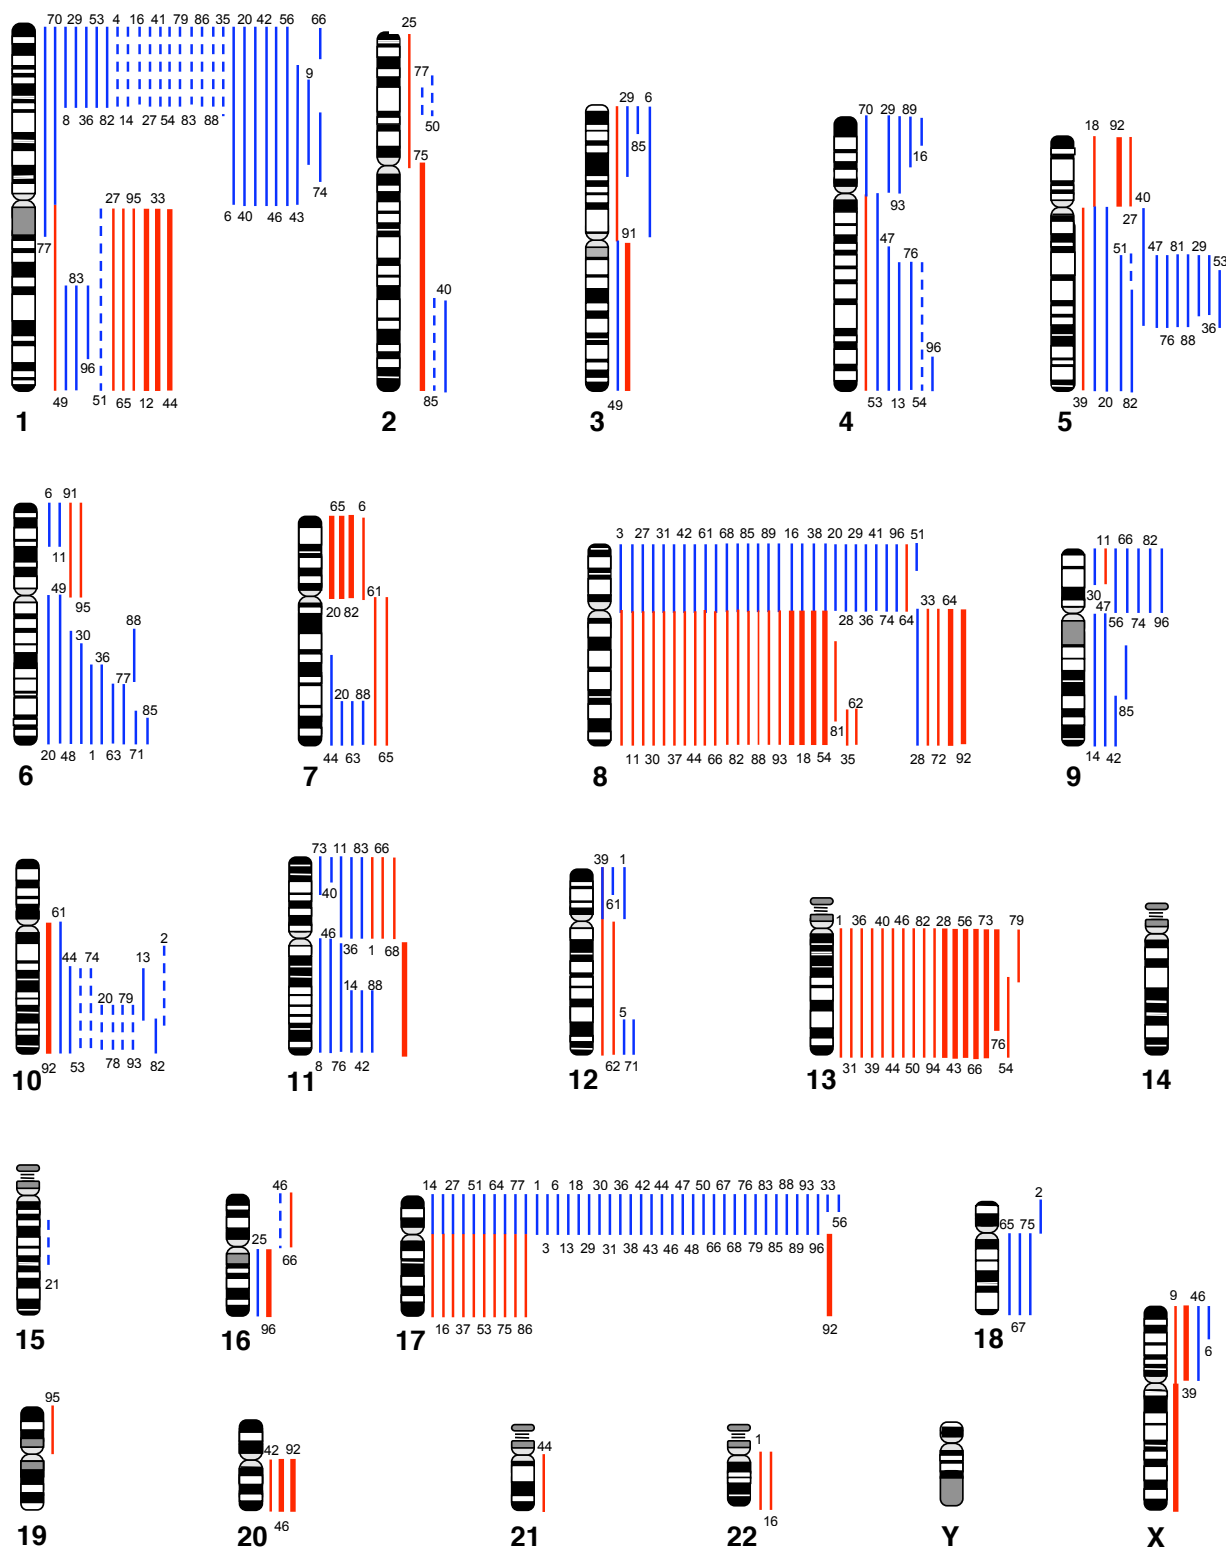

**Supplementary Figure S1** R-banding schematic karyotype indicating the chromosomal imbalances resulting from the structural rearrangements identified in our sample of 96 near-diploid colorectal cancers. Red lines, gains; blue lines, losses; thick red lines, multiple gains; dotted blue lines, deletions within a chromosomal region that could not be accurately identified; numbers, case number.
