# Supplementary material for: Chromosomal Instability in Near-Diploid Colorectal Cancer: A Link between Numbers and Structure
Source: PLoS One. 2008 Feb 20;3(2):e1632. doi: 10.1371/journal.pone.0001632 (PMC2238794; doi:10.1371/journal.pone.0001632)
Supplement: Table S3 — Karyo-array of the tumors: involvement of individual chromosomes in structural rearrangements and resulting chromosomal imbalances Chromosome arms were coded as 2 if present in normal status (i.e. two copies for all autosomes, for X chromosome in females and one copy for X and Y chromosomes in males), as 1 or 0 (blue background) if one or two copies copies were lost and as 3, 4 or 5 (red background) if one, two or three supernumerary copies were found. Case, tumor number; Rea, total number of rearranged chromosomes, a rearranged chromosome was counted only once even if present in more than one copy; Bal, number of balanced rearrangements; SR losses, number of chromosomal losses resulting from structural rearrangements; SR gains, number of chromosomal gains resulting from structural rearrangements, multiple gains of one chromosome arm were counted only once; p, short arm; q, long arm (0.07 MB PDF) [file pone.0001632.s003.pdf]

[illegible]

### TUMORS WITH UNKNOWN MICROSATELLITE STATUS

Case, tumor number; Rea, total number of rearranged chromosomes, a rearranged chromosome was counted only once even if present in more than one copy; Bal, number of balanced rearrangements; SR losses, number of chromosomal losses resulting from structural rearrangements; SR gains, number of chromosomal gains resulting from structural rearrangements, multiple gains of one chromosome arm were counted only once; p, short arm; q, long arm
